# Supplementary material for: First Report on Medical Treatment and Outcome of Burnt Cattle
Source: MDPI journal article supplement (doi:10.3390/vetsci10030187), 2023-03-01
Supplement: s1 [file s1]

# First Report on Medical Treatment and Outcome of Burnt Cattle

Marilena Bolcato <sup>1,\*</sup>, Mariana Roccaro <sup>2</sup>, Arcangelo Gentile <sup>1</sup>, Angelo Peli <sup>2</sup>

<sup>1</sup> Department of Veterinary Medical Sciences, Alma Mater Studiorum University of Bologna, Ozzano dell'Emilia 40064 - Bologna, Italy

<sup>2</sup> Department for Life Quality Studies, Alma Mater Studiorum University of Bologna, 47921 - Rimini, Italy

\* Correspondence: marilena.bolcato2@unibo.it

**Table S1.** Blood-biochemical parameters at the day of admission (T0) and after 15 days (T15) of heifer 1 and heifer 2.

| Parameter (measure unit)         | Heifer 1 |         | Heifer 2 |         |
|----------------------------------|----------|---------|----------|---------|
|                                  | T0       | T15     | T0       | T15     |
| Haemoglobin (gr%)                | 7.8      | 10.3    | 7.9      | 11      |
| Haematocrit (%)                  | 24.7     | 29.6    | 24.9     | 31.9    |
| Erythrocytes (/mm <sup>3</sup> ) | 6850000  | 8440000 | 7310000  | 9470000 |
| Platelets (/mm <sup>3</sup> )    | 1198000  | 855000  | 1035000  | 1059000 |
| Leukocytes (/mm <sup>3</sup> )   | 33740    | 43250   | 16790    | 17630   |
| Lymphocytes (/mm <sup>3</sup> )  | 5540     | 7020    | 3290     | 4230    |
| Monocytes (/mm <sup>3</sup> )    | 870      | 600     | 1270     | 840     |
| Neutrophils (/mm <sup>3</sup> )  | 25870    | 34620   | 11620    | 11850   |
| Eosinophils (/mm <sup>3</sup> )  | 810      | 260     | 250      | 430     |
| Basophils (/mm <sup>3</sup> )    | 430      | 640     | 180      | 200     |
| Aspartate Aminotransferase (U/L) | 292      | 226     | 103      | 77      |
| Lactate Dehydrogenase (IU/L)     | 3722     | 3282    | 2598     | 2654    |
| Creatine Kinase (U/L)            | 1931     | 789     | 396      | 1095    |
| Alkaline Phosphatase (U/L)       | 456      | 739     | 523      | 456     |
| Creatinine (mg/dL)               | 0.44     | 0.36    | 0.57     | 0.57    |
| Urea (mg/dL)                     | 11.80    | 26.70   | 22.33    | 17.66   |
| Glucose (mg/dL)                  | 62       | 106     | 61       | 89      |
| Total Cholesterol (mg/dL)        | 58       | 33      | 82       | 59      |
| Gamma-Glutamyl Transferase (U/L) | 22.7     | 24      | 18.9     | 25.1    |
| Total Protein (g/dL)             | 5.58     | 7.67    | 6.20     | 9.68    |
| Albumin (g/dL)                   | 2.12     | 1.63    | 2.47     | 2.33    |
| Sodium (mEq/L)                   | 139      | 135     | 136      | 137     |
| Potassium (mEq/L)                | 5.1      | 3.7     | 4.5      | 4.3     |
| Chlorine (mEq/L)                 | 96       | 89      | 96       | 95      |
| Magnesium (mg/dL)                | 1.87     | 1.12    | 1.94     | 1.51    |

**Table S2.** Coagulation parameters at the day of admission (T0), after 15 days (T15), at the day of euthanasia (T20) for Heifer 1 and after 30 days (T30) of hospitalization for Heifer 2.

| Parameter (measure unit)                  | Heifer 1 |       |      | Heifer 2 |      |       |
|-------------------------------------------|----------|-------|------|----------|------|-------|
|                                           | T0       | T15   | T20  | T0       | T15  | T30   |
| Prothrombin Time (s)                      | 19.2     | 32.2  | 52.7 | 23.3     | 22.0 | 21.0  |
| Activated Partial Thromboplastin Time (s) | 61.3     | 54.4  | 61.1 | 83.7     | 57.5 | 50.03 |
| Fibrinogen (g/L)                          | 26.39    | 20.62 | 4.83 | 9.97     | 6.09 | 5.98  |
| D-Dimer ( $\mu\text{g/mL}$ )              | 4.71     | 2.70  | 3.30 | 3.79     | 1.21 | 0.11  |
| Anti-thrombin III (%)                     | 104      | 91    | 70   | 102      | 111  | 105   |
